# Supplementary material for: Performance improvement strategies of a cobalt-based electrode for the electrooxidation of sodium borohydride
Source: Royal Society of Chemistry journal article supplement (doi:10.1039/d2se01379g), 2022-12-26
Supplement: d2se01379g1.pdf [file d2se01379g1.pdf]

### Electronic Supplementary Information

#### Performance improvement strategies of cobalt based electrode for the electrooxidation of sodium borohydride

Ya Li, Tong Sun, Youzhi Liu, Weizhou Jiao, Jing Gao, Dongming Zhang\*

*Shanxi Province Key Laboratory of Hige-Oriented Chemical Engineering,*

*North University of China, Taiyuan, 030051, P.R.China.*

*E-mails: [zhangdongming06@outlook.com](mailto:zhangdongming06@outlook.com); Fax: +86 351 3921497; Tel: +86 351*

*3921986*

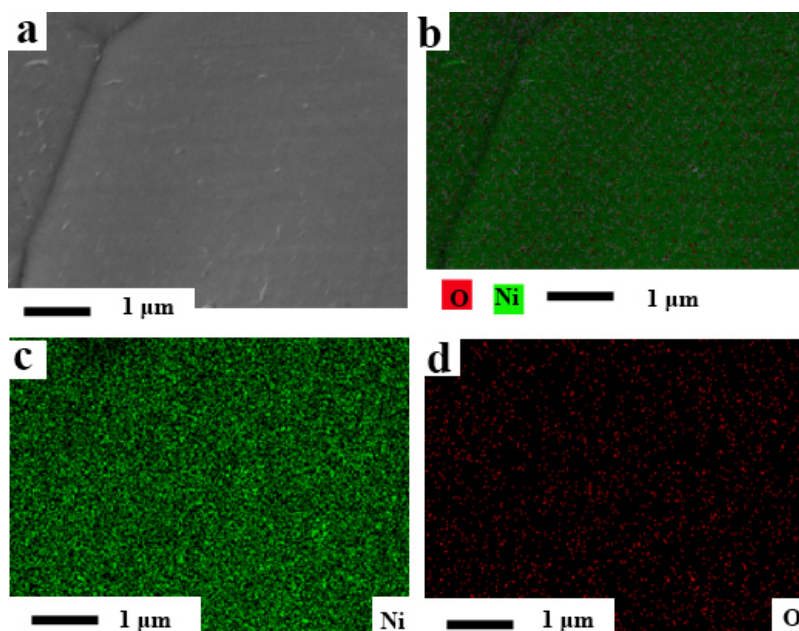

Fig. S1 SEM image (a) of the NF electrode and corresponding EDS images (b-d).

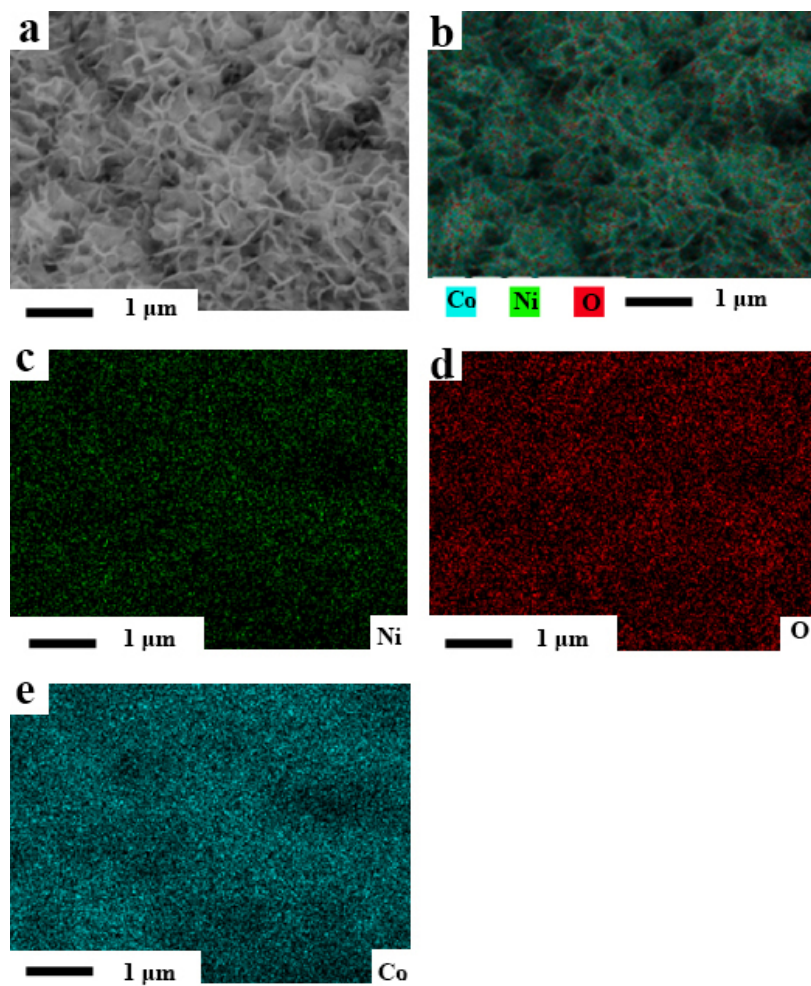

Fig. S2 SEM image (a) of the Co/NF electrode and corresponding EDS images (b-e).

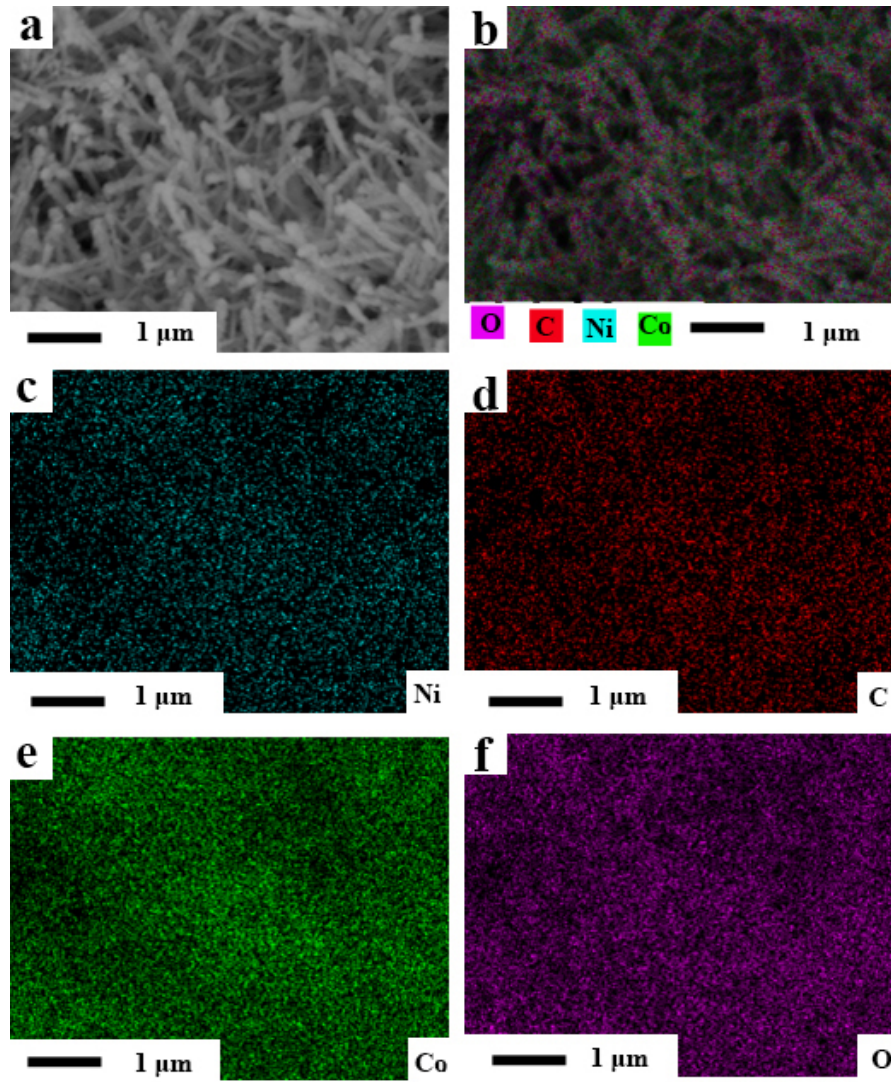

Fig. S3 SEM image of the Co/NF-CoC<sub>2</sub>O<sub>4</sub> electrode (a) and corresponding EDS images (b-f).

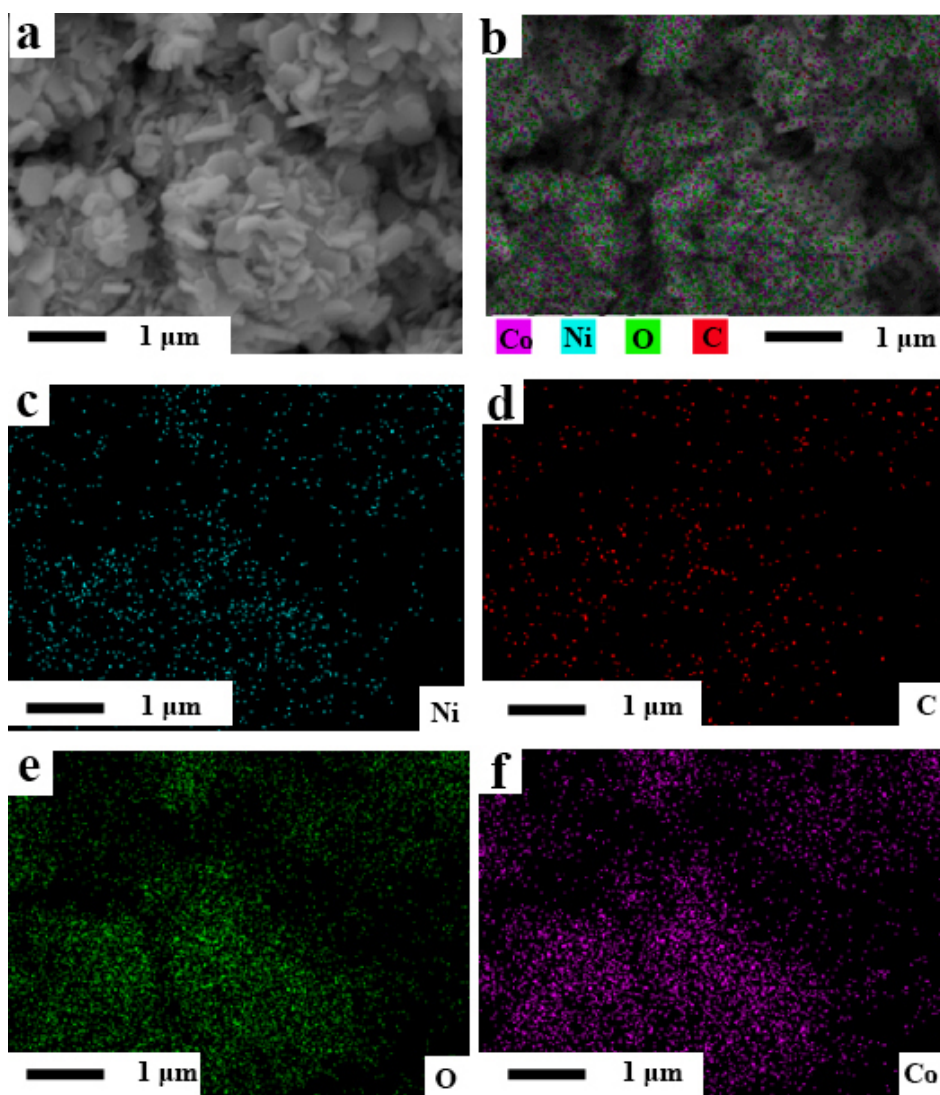

Fig. S4 SEM image of Co/NF-CoC<sub>2</sub>O<sub>4</sub>-Co electrode after the CV test in 1.5 mol dm<sup>-3</sup> NaOH (a) and corresponding EDS images (b-f).

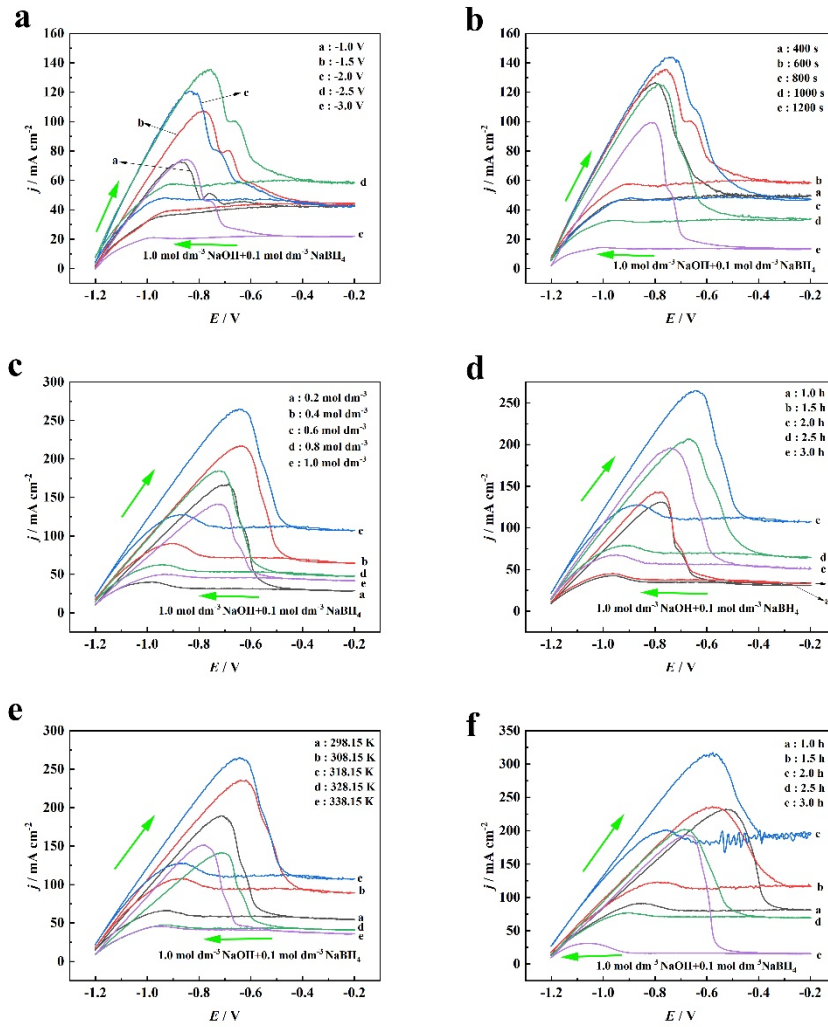

Fig. S5 CV curves of Co/NF electrode prepared under different deposition conditions: deposition potential (-1.0~-3.0 V) (a), deposition time (400~1200 s) (b); CV curves of Co/NF- $\text{CoC}_2\text{O}_4$  electrode prepared under different etching conditions: concentration of  $\text{H}_2\text{C}_2\text{O}_4$  (0.2~1.0 mol  $\text{dm}^{-3}$ ) (c), time of  $\text{H}_2\text{C}_2\text{O}_4$  etching (1~3 h) (d) and temperature of  $\text{H}_2\text{C}_2\text{O}_4$  etching (298.15~338.15 K) (e); CV curves of Co/NF- $\text{CoC}_2\text{O}_4$ -Co electrode prepared under different reduction times (1~3 h) (f). All CV tests were performed in 1.0 mol  $\text{dm}^{-3}$  NaOH+0.1 mol  $\text{dm}^{-3}$   $\text{NaBH}_4$  solution at the scan rate of 10  $\text{mV s}^{-1}$ .
